# Supplementary material
Source: MDPI journal article supplement (https://www.mdpi.com/2071-1050/15/7/5784)
Supplement: s1 [file s1]

## **Supplementary S2**

### **Questionnaire Survey- Questions**

**Question 1.** Do you think that our current healthcare buildings are sustainable?

**Question 2.** Why?

**Question 3.** In your opinion, which building sustainable assessment tool is the most popular in our region?

**Question 4.** Why?

**Question 5.** Do you have any suggestions to improve sustainable building assessment tools?

**Question 6.** Do you think that there is a need to assess and report Healthcare Building performance considering the life cycle perspective?

**Question 7.** Do you have any suggestion for assessing and reporting sustainability in healthcare buildings?
