# Supplementary material
Source: MDPI journal article supplement (https://www.mdpi.com/2071-1050/15/7/5784)
Supplement: s1 [file s1]

## **Supplementary S3**

### **Questionnaire survey**

This Questionnaire survey is a part of a research project to develop set of patient-centeredness indicators to be used by relevant stakeholders in healthcare:

#### **Part 1.**

##### **Personal Details**

##### **1. Gender:**

Male

Female

##### **2. Age group is:**

Less than 22 years old

23-33 years old

34-44 years old

45-55 years old

Older than 55 years old

##### **3. Region:**

Mecca Region

Riyadh Region

Eastern Region

Asir Region

Jazan Region

Medina Region

Al-Qassim Region

Tabuk Region

Ha'il Region

Najran Region

Al-Jawf Region

Al-Bahah Region

Northern Borders Region

##### **4. Educational level:**

High School

Bachelor's Degree

Master's Degree

PhD

## Supplementary S3

### Part 2.

#### General questions

**5. According to your knowledge, please identify the current situation of patient-centeredness in healthcare in Saudi Arabia compared to the top developed countries:**

- Haven't started yet
- Just started to be considered
- Almost mature
- Very mature and takes the lead

**6. How can we improve the patient-centeredness in healthcare building in Saudi Arabia, please select from the following options:**

- a. Establish a governance system
- b. Develop reporting and assessment system
- c. Improve professionals' conscious
- d. All

**7. Do you think that developing patient-centeredness indicators to be used by relevant stakeholder in healthcare building, would improve the situation?**

- Yes
- No

## Supplementary S3

### Part 3.

#### Patient-Centeredness questions

**8. Considering the Saudi context. Do you agree that the following Picker's Patient-Centeredness Care domains will cover all patient-centeredness aspects? If No please add new domain?**

**The 8's domains of Patient-Centeredness Care defined by Picker's are:**

- A. Access to care
- B. Continuity and transition (after discharge)
- C. Involvement of family and friends
- D. Emotional support and alleviation of fear and anxiety
- E. Physical comfort
- F. Information and education
- G. Coordination and integration of care
- H. Respect for patients' values, preferences and expressed needs

Yes

No

.....  
.....

**9. Considering the Saudi context, Please specify the domains that are still need to be improved.**

All the Domains

Most of them

Non of them

Some. Please circle .....A...B...C...D...E...F...G...H.....
